# Supplementary material for: Heteroepitaxial growth of ZnO branches selectively on TiO2 nanorod tips with improved light harvesting performance
Source: Royal Society of Chemistry journal article supplement (doi:10.1039/c1cc12309b), 2011-01-01
Supplement: c1cc12309b.pdf [file c1cc12309b.pdf]

Supplementary Material (ESI) for Chemical Communications  
This journal is (c) The Royal Society of Chemistry 2011

Electronic Supplementary Material

## **Heteroepitaxial Growth of ZnO Branches Selectively on TiO<sub>2</sub> Nanorod Tips with Improved Light Harvesting Performance**

**Feng Gu,<sup>a,b</sup> Lili Gai,<sup>a</sup> Wei Shao,<sup>a</sup> Chunzhong Li<sup>a,\*</sup> and Lukas Schmidt-Mende<sup>b,\*</sup>**

*<sup>a</sup>Key Laboratory for Ultrafine Materials of Ministry of Education  
School of Materials Science and Engineering  
East China University of Science & Technology  
Shanghai 200237, China  
E-mail: czli@ecust.edu.cn*

*<sup>b</sup>Department of Physics and Center for NanoScience (CeNS)  
Ludwig-Maximilians University (LMU)  
Munich 80799, Germany  
E-mail: L.Schmidt-Mende@physik.uni-muenchen.de*

Supplementary Material (ESI) for Chemical Communications  
This journal is (c) The Royal Society of Chemistry 2011

## Experimental Section

### Synthesis method:

TiO<sub>2</sub> nanorod film: TiO<sub>2</sub> nanorod films were prepared by a facile hydrothermal method<sup>1</sup>. 15mL of deionized water was mixed with 15mL of concentrated hydrochloric acid (36.5%~38% by weight). After 5min stirring, 0.5mL of tetrabutyl titanate (97%, Aldrich) was added. After another 5min stirring, the mixture was transferred into a 50mL Teflon-lined autoclave, and a piece of clean FTO substrate was placed at an angle against the wall of the autoclave with the conducting side facing down. The hydrothermal synthesis was maintained at 150~180°C for 3h~5h. After the reaction, the autoclave was cooled to room temperature naturally. Then, the product was rinsed with deionized water and dried at 80°C for 60min.

Synthesis of ZnO/TiO<sub>2</sub> HNs: Firstly, a thin layer of ZnO seeds was coated on the surface of TiO<sub>2</sub> nanorod film. Without any surface modification, the film was wet with two droplets of 5 mM zinc acetate dihydrate (98%, Aldrich) in ethanol, rinsed with ethanol and blown dry. After repeating three times, the film was covered with a layer of zinc acetate crystallites and heated at 300°C for 20min. Then, the seeded film was suspended upside down in aqueous solutions containing 0.01~0.025M zinc nitrate hydrate, 0.005~0.0125M hexamethylenetetramine (HMT), and 0.004~0.005M polyethylenimine (PEI) at 95°C for 15~120min. The ZnO/TiO<sub>2</sub> HNs were then rinsed with deionized water and blown dry. Finally the HNs were annealed at 450°C for 30min to improve the crystallinity.

(1) B. Liu, E. S. Aydil, *J. Am. Chem. Soc.*, 2009, **131**, 3985.

### Characterization

Scanning electron micrograph (SEM) images were taken with HITACHI S-4800 field-emission scanning electron microscopy, equipped with energy dispersive spectrometer (EDS Oxford). Transmission electron microscope (JEM-2100) and high-resolution transmission electron microscope (JEM-2010F) were used to characterize the samples. The X-ray diffraction (XRD) patterns of the samples were measured by using Japan Rigaku D/Max 2550, Cu K $\alpha$  radiation. ater CAs were measured with a contact angle measuring device (Powereach JC2000D3, China) at ambient temperature. Diffuse reflectance spectra (DRS) were obtained for the dry-pressed disk samples using a Scan UV-Vis-NIR spectrophotometer (Varian, Cary 500) equipped with an integrating sphere assembly. The excitation and photoluminescence (PL) spectra of the sample were measured with a Jobin Fluorolog-3-p spectrophotometer with a Xe lamp at room temperature.

Supplementary Material (ESI) for Chemical Communications

This journal is (c) The Royal Society of Chemistry 2011

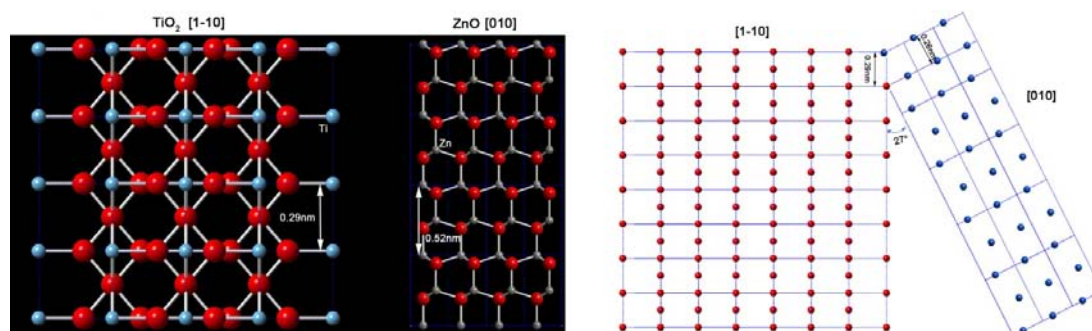

**Fig. S1** (a) Structure models of the atomic arrangement with zone axis of [1-10] and [010] for TiO<sub>2</sub> and ZnO, respectively.

(b) A 2D atomic arrangement with a twisted angle of 27° demonstrating the epitaxial relationship between TiO<sub>2</sub> and ZnO.

Supplementary Material (ESI) for Chemical Communications  
This journal is (c) The Royal Society of Chemistry 2011

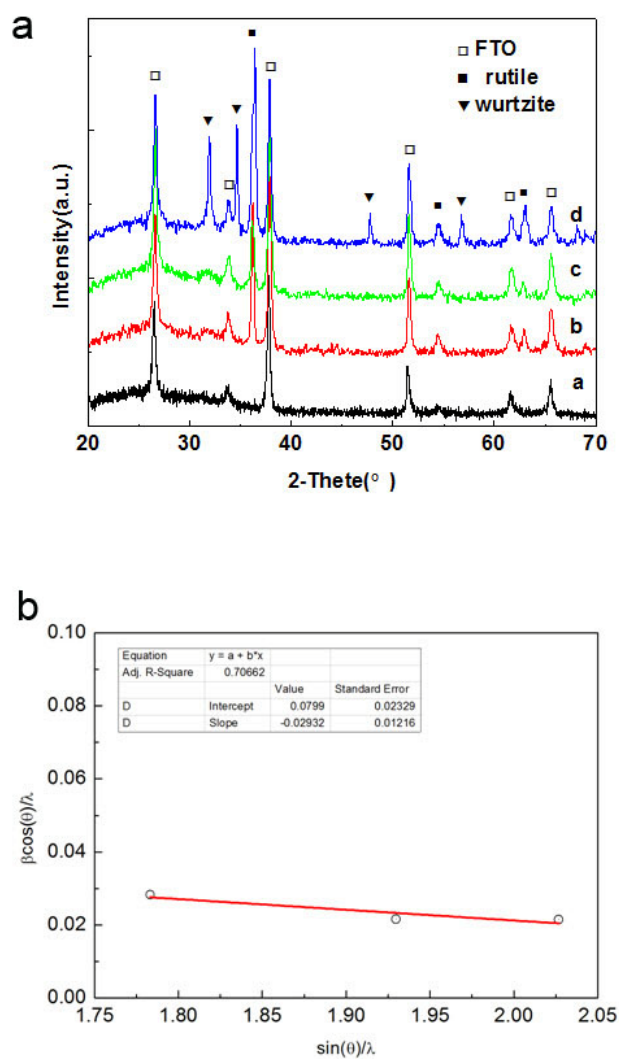

**Fig. S2** (a) XRD patterns of FTO substrate a), TiO<sub>2</sub> nanorod film b), seeded TiO<sub>2</sub> nanorod film c) and ZnO/TiO<sub>2</sub> HNs d). (b)  $\beta \cos \theta / \lambda$  vs  $\sin \theta / \lambda$  for the obtained HNs.

Supplementary Material (ESI) for Chemical Communications  
This journal is (c) The Royal Society of Chemistry 2011

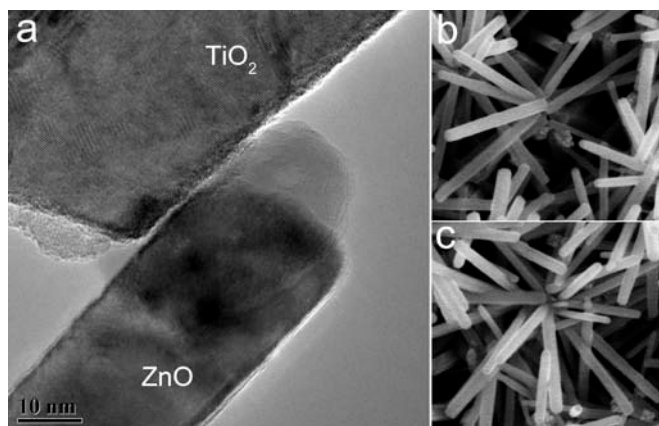

**Fig. S3** TEM and SEM images of the ZnO/TiO<sub>2</sub> HNs showing ZnO branch anchoring to TiO<sub>2</sub> nanorod with point contacts..

Supplementary Material (ESI) for Chemical Communications  
This journal is (c) The Royal Society of Chemistry 2011

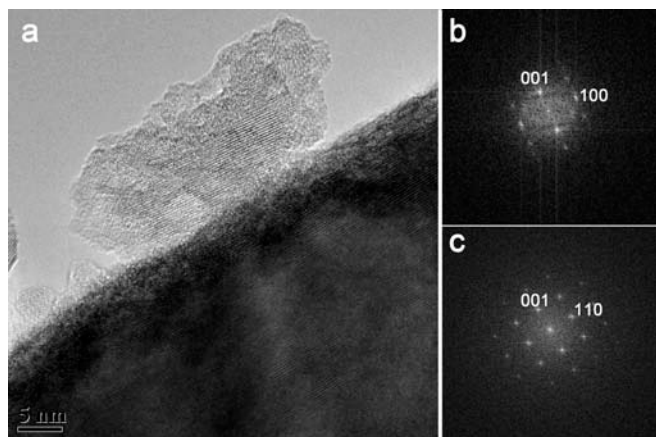

**Fig. S4** HRTEM image and corresponding fast Fourier transform (FFT) patterns showing one ZnO seed anchoring to the outsurface of TiO<sub>2</sub> nanorod also with the epitaxial correlation.

Supplementary Material (ESI) for Chemical Communications

This journal is (c) The Royal Society of Chemistry 2011

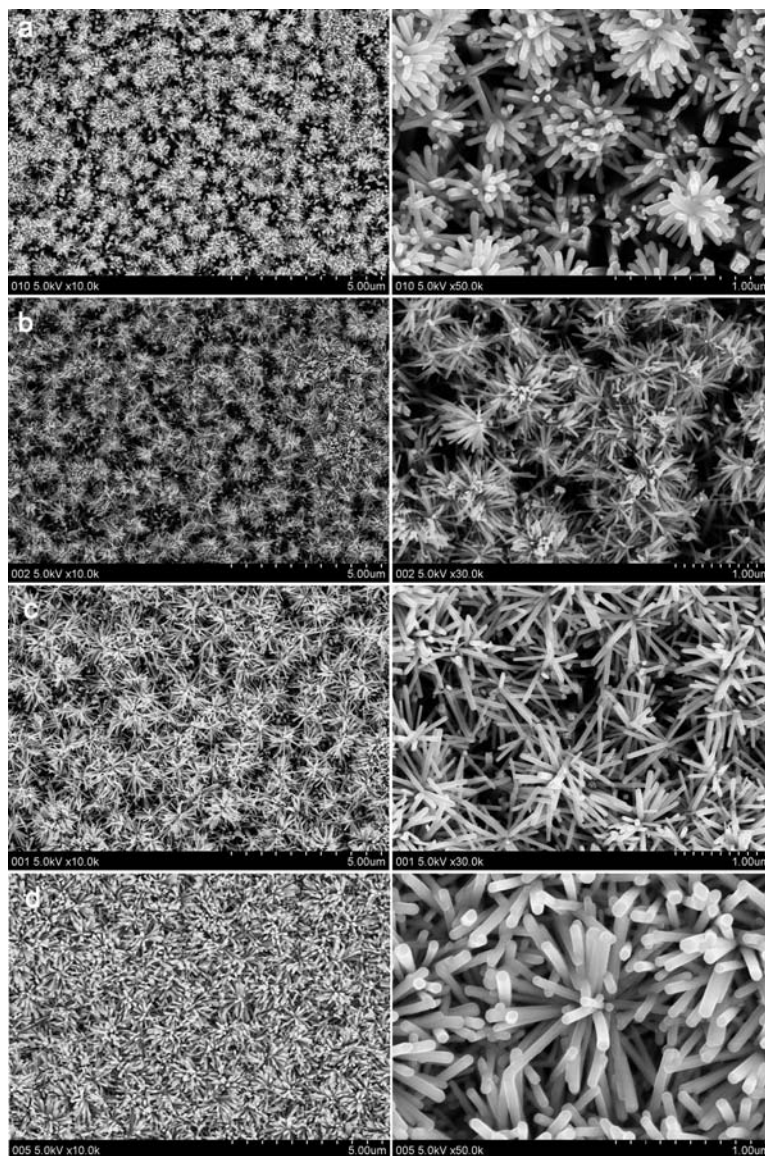

**Fig. S5** SEM images of the ZnO/TiO<sub>2</sub> HNs with different branch lengths: a) 200nm, b) 300nm, c) 600nm, d) 1000nm.

Supplementary Material (ESI) for Chemical Communications

This journal is (c) The Royal Society of Chemistry 2011

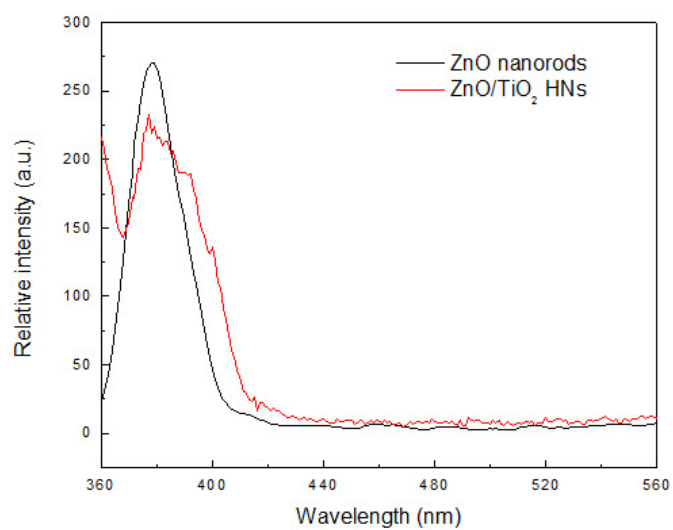

**Fig. S6** Photoluminescent spectra of ZnO nanorod film and ZnO/TiO<sub>2</sub> HNs with similar ZnO nanorod length.



Supplementary Material (ESI) for Chemical Communications

This journal is (c) The Royal Society of Chemistry 2011

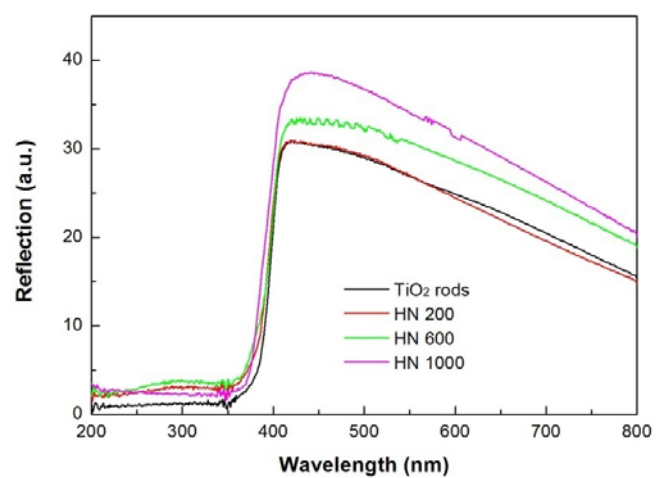

Fig. S7 UV-Vis diffused reflection spectra of the ZnO/TiO<sub>2</sub> HNs film and TiO<sub>2</sub> nanorod film.
